# Supplementary material for: A regenerable copper mesh based oil/water separator with switchable underwater oleophobicity
Source: Royal Society of Chemistry journal article supplement (doi:10.1039/c6ra21099f), 2016-01-01
Supplement: c6ra21099f1.pdf [file c6ra21099f1.pdf]

## Electronic Supplementary Information

### Regenerable copper mesh based oil/water separator with switchable underwater oleophobicity

Yi Chen,<sup>ab</sup> Xinda Li,<sup>a</sup> Mary Glasper,<sup>ac</sup> Li, Liu,<sup>a</sup> Hyun-Joong Chung<sup>\*a</sup>, John A Nychka<sup>\*a</sup>

<sup>a</sup>Department of Chemical and Material Engineering, University of Alberta, Edmonton, Alberta, T6G2V4 Canada

<sup>b</sup>Scion, Private Bag 3020, Rotorua, 3046, New Zealand

<sup>c</sup>Department of Human Ecology, University of Alberta, Edmonton, Alberta, T6G2N1 Canada

Corresponding Author Email: chung3@ualberta.ca; jnychka@ualberta.ca

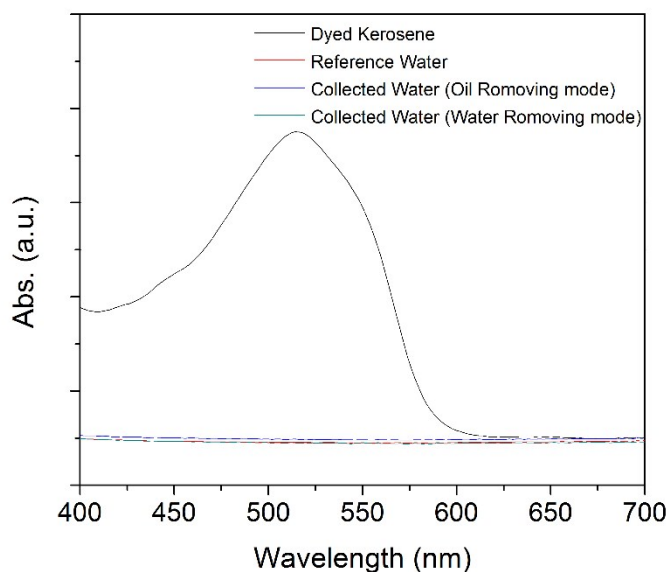

Fig S1. UV-Visible absorption spectrum of dyed kerosene, reference water and collected water after separation.

UV-visible absorption spectra were recorded by a UV-vis spectrophotometer (Perkin-Elmer NIR-UV, USA), to determine if there was oil left in the water after “water-removing” and “oil-removing” mode separation. Oil (Kerosene) was dyed with Oil Red O (1 wt%, Sigma-Aldrich) with typical absorption peak at around 518 nm. UV-Visible absorption spectra of water after

separation was compared with dyed oil (Fig. S1). There was no discernible dye absorption peak observed of the water separated using both “water-removing” and “oil-removing” mode, which suggests that the separated water contains no oil.<sup>1-3</sup>

### Reference

1. K. Rohrbach, Y. Li, H. Zhu, Z. Liu, J. Dai, J. Andreasen and L. Hu, *Chem. Commun.*, 2014, 50, 13296.
2. C-F Wang, H-C. Huang and L-T Chen, *Sci. Rep.*, 2015, 5, 14294.
3. Y. Chen, L. Liu, H-J. Chung and J. A. Nychka, *RSC Adv.*, 2015, 5, 91001.
